# Supplementary material
Source: PubMed Central journal article supplement (PMC6361123)
Supplement: NIHMS1003081-supplement-Supplemental.pdf [file NIHMS1003081-supplement-Supplemental.pdf]

## **Supporting Information**

### **Pre-clinical efficacy and characterization of candidate vaccines for treatment of opioid use disorders using clinically viable carrier proteins**

<sup>1,#</sup>Federico Baruffaldi, <sup>1,#</sup>April Huseby Kelcher, <sup>1</sup>Megan Laudenbach, <sup>1,2</sup>Valeria Gradinati, <sup>3</sup>Ajinkya Limkar, <sup>3</sup>Michaela Roslawski, <sup>3</sup>Angela Birnbaum, <sup>4</sup>Andrew Lees, <sup>5</sup>Carla Hassler, <sup>5</sup>Scott Runyon, and <sup>1,6,\*</sup>Marco Pravetoni.

*#equally contributed to the manuscript, co-first authors.*

<sup>1</sup>Hennepin Healthcare Research Institute (HHRI, formerly Minneapolis Medical Research Foundation or MMRF), MN, <sup>2</sup>Universita' degli Studi di Milano, Dipartimento di Chimica e Tecnologie Farmaceutiche, Socrates Program, Italy, <sup>3</sup>University of Minnesota, MN, <sup>4</sup>Fina Biosolutions LLC, MD, <sup>5</sup>RTI International, NC, <sup>6</sup>Departments of Medicine and Pharmacology, Center for Immunology, University of Minnesota, MN

## S1. Synthesis of Oxycodone-based hapten with PEG linker [OXY(PEG)<sub>3</sub>]

Synthesis of Oxy-carboxymethoxyloxime-Peg<sub>3</sub>OCH<sub>2</sub>CO<sub>2</sub> Lithium salt (Oxy-Glyoxime-Peg<sub>3</sub>-OCH<sub>2</sub>CO<sub>2</sub>Li, OXY(Peg)<sub>3</sub>OH)

### Scheme 1: Synthesis of H<sub>2</sub>N-Peg<sub>3</sub>-O-Gly-OMe

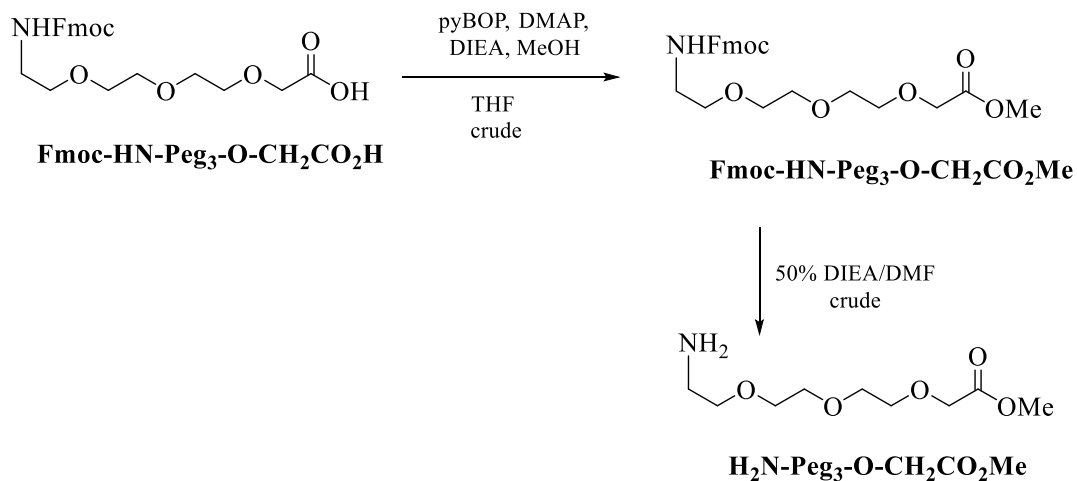

### Scheme 2: Synthesis of Oxy-Glyoxime-OH

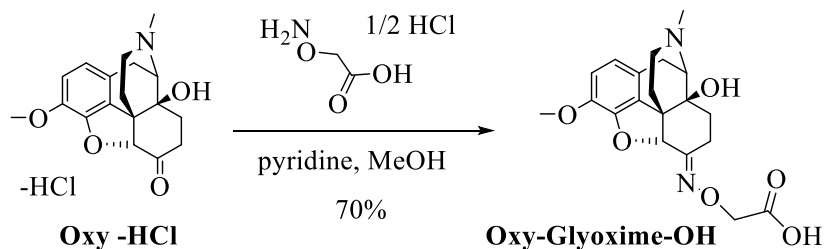

### Scheme 3: Synthesis of Oxy-Glyoxime-NH-Peg<sub>3</sub>-O-CH<sub>2</sub>CO<sub>2</sub>Li

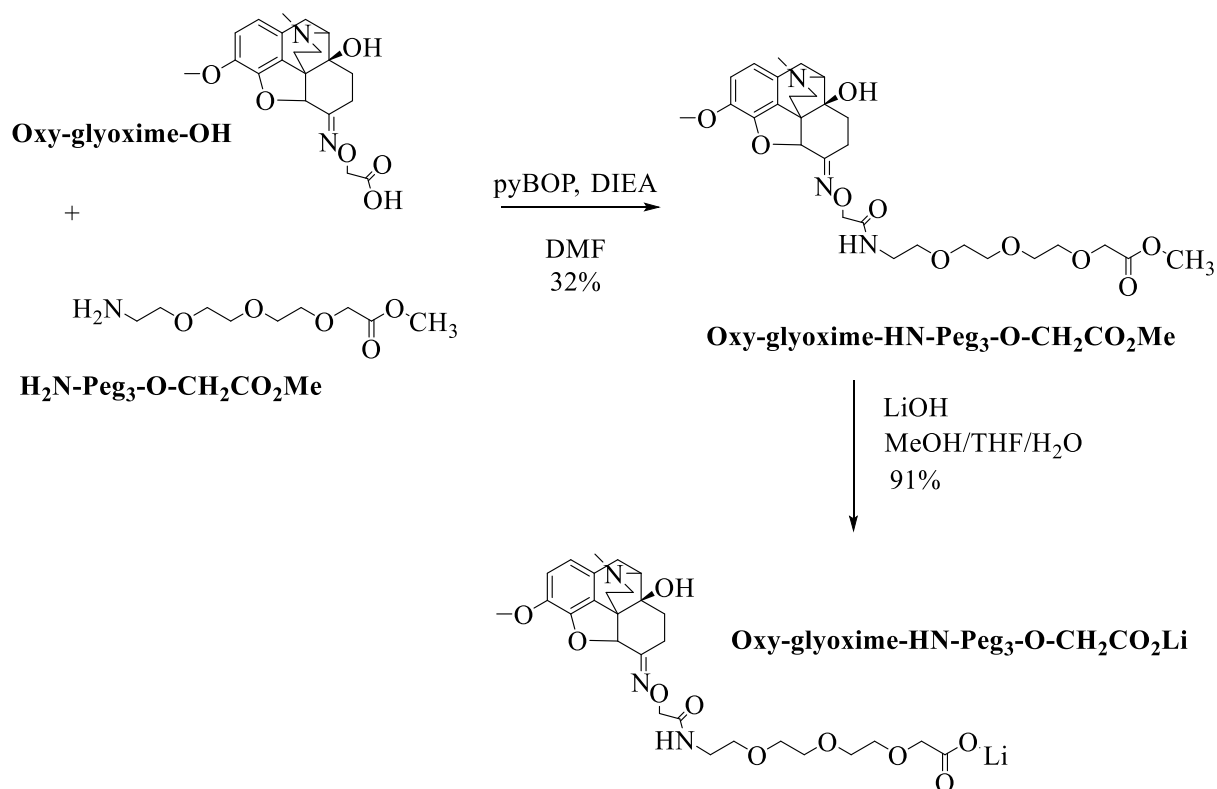

### Experimental details:

**Chemistry General:** All standard reagents were commercially available. Fmoc-HN-Peg<sub>3</sub>-O-CH<sub>2</sub>CO<sub>2</sub>H was purchased from ChemPep Inc. (Wellington, Florida). Intermediates were purified by column chromatography on a Teledyne ISCO Rf chromatography unit unless otherwise indicated. The purity of intermediates and final compounds was determined using an Agilent-Varian HPLC system equipped with Prostar 210 dual pumps, a Prostar 335 Diode UV detector and a SEDEX75 (SEDERE, Olivet, France) ELSD detector and an analytical Synergy Hydro<sup>®</sup> RP80A C18 (4 μm particle size, 250 x 4.60 mm column; Phenomenex) with a linear gradient of 5%-95% solvent B over 20 min at a flow rate of 1 mL/min. Absorbance was monitored at 220 nm. The HPLC solvent system was binary: water containing 0.1% trifluoroacetic acid (TFA) and solvent B (acetonitrile containing 5% water and 0.1% TFA). The molecular ion of intermediates and final compounds was determined using a PE Sciex API 150 EX LC/MS system from Perkin Elmer (San Jose, California). Reactions were monitored by thin-layer

chromatography (TLC) carried out on pre-coated 60 Å 250 mm silica gel TLC plates with F-254 indicator visualized under UV light. <sup>1</sup>H NMR spectra were recorded at 300 MHz on a Bruker Avance 300 Spectrospin instrument and are reported as follows: chemical shift  $\delta$  in ppm (multiplicity, coupling constant (Hz), and integration. The following abbreviations were used to explain multiplicities: s = singlet, d = doublet, t = triplet, q = quartet, quin = quintet, m = multiplet, br = broad, dd = doublet of doublets.

**Methyl 1-(9H-fluoren-9-yl)-3-oxo-2,7,10,13-tetraoxa-4-azapentadecan-15-oate, Fmoc-HN-Peg<sub>3</sub>-O-CH<sub>2</sub>CO<sub>2</sub>Me:** To a solution of 9H-fluoren-9-yl)-3-oxo-2,7,10,13-tetraoxa-4-azapentadecan-15-oic acid (**Fmoc-HN- Peg<sub>3</sub>-O-CH<sub>2</sub>CO<sub>2</sub>H**, 500 g, 1.16 mmol) in methanol/THF (1:5, 12 mL) was added pyBOP (905 mg, 1.74 mmol), DIEA (808  $\mu$ L, 4.64 mmol), and DMAP (14 mg, 0.12 mmol). The reaction mixture was stirred at room temperature for 12 hr. The mixture was concentrated *in vacuo* to provide methyl 1-(9H-fluoren-9-yl)-3-oxo-2,7,10,13-tetraoxa-4-azapentadecan-15-oate (**Fmoc-HN-Peg<sub>3</sub>-O- CH<sub>2</sub>CO<sub>2</sub>Me**, 514 mg, quant.) as a crude mixture. <sup>1</sup>H NMR (300 MHz, DMSO-d<sub>6</sub>)  $\delta$  ppm 3.24 - 3.59 (m, 13 H) 3.63 (s, 3 H) 4.12 (s, 1 H) 4.18 - 4.24 (m, 1 H) 4.28 (s, 1 H) 4.36 (s, 1 H) 7.25 - 7.46 (m, 5 H) 7.59 (d, J=8.29 Hz, 1 H) 7.69 (d, J=6.97 Hz, 1 H) 7.82 - 7.93 (m, 2 H); ESI MS *m/z*: calculated for C<sub>24</sub>H<sub>29</sub>NO<sub>7</sub> 443.5, found 466.7 (M+Na)<sup>+</sup>.

**Methyl {2-[2-(2-aminoethoxy)ethoxy]ethoxy}acetate, H<sub>2</sub>N-Peg<sub>3</sub>-O- CH<sub>2</sub>CO<sub>2</sub>Me:** To a solution of crude methyl 1-(9H-fluoren-9-yl)-3-oxo-2,7,10,13-tetraoxa-4-azapentadecan-15-oate (**Fmoc-HN-Peg<sub>3</sub>-O-CH<sub>2</sub>CO<sub>2</sub>Me**) in methanol (15 mL) was added piperidine (3 mL), and the reaction mixture stirred at room temperature for 6 hr. The reaction mixture was concentrated and dried *in vacuo* to provide methyl {2-[2-(2-aminoethoxy)ethoxy]ethoxy}acetate (**H<sub>2</sub>N-Peg<sub>3</sub>-O-CH<sub>2</sub>CO<sub>2</sub>Me**) as a crude mixture. ESI MS *m/z*: calculated for C<sub>9</sub>H<sub>19</sub>NO<sub>5</sub> 221.2, found 222.2 (M+H)<sup>+</sup>.

**{{[(6E)-14-hydroxy-3-methoxy-17-methyl-4,5-epoxymorphinan-6-ylidene]amino}oxy}acetic acid,**

**Oxy-Glyoxime-OH:** To a solution of 14-hydroxy-3-methoxy-17-methyl-4,5-epoxymorphinan-6-one hydrochloride salt (**Oxycodone HCl**, 2.0 g, 6.34 mmol) in MeOH (10 mL) was added 1M NaOH (6.6 mL, 1.05 equiv). The reaction mixture was stirred for 15 min, then concentrated *in vacuo*, and dried *in vacuo* for 2 h. The residue was re-dissolved in anhydrous MeOH (200 mL) and carboxylmethoxylamine (1.04 mg, 9.5 mmol) and pyridine (1.52 mL, 3.0 equiv) were added. The mixture was stirred at reflux temperature for 16 hr, then cooled to room temperature and concentrated *in vacuo*. The residue was re-dissolved in acetone (10 mL) and precipitated with ether (120 mL). The precipitate was collected, re-precipitated and dried *in vacuo* to provide ({{[(6E)-14-hydroxy-3-methoxy-17-methyl-4,5-epoxymorphinan-6-ylidene]amino}oxy}acetic acid (**Oxy-Glyoxime-OH**) as a white powder (2.6 g, 70% yield). <sup>1</sup>H NMR (300 MHz, DMSO-*d*<sub>6</sub>) δ ppm 1.08 - 1.25 (m, 2 H) 1.35 - 1.62 (m, 3 H) 1.81 (d, *J*=9.23 Hz, 1 H) 2.30 (br. s., 2 H) 2.41 - 2.46 (m, 3 H) 2.63 (br. s., 2 H) 3.05 (br. s., 2 H) 3.14 - 3.23 (m, 1 H) 3.71 - 3.80 (m, 3 H) 4.55 (s, 2 H) 4.94 (br. s., 1 H) 6.69 (d, *J*=7.72 Hz, 1 H) 6.81 (d, *J*=8.10 Hz, 1 H); ESI MS *m/z*: calculated for C<sub>20</sub>H<sub>24</sub>N<sub>2</sub>O<sub>6</sub> 388.4, found 389.7 (M+H)<sup>+</sup>; HPLC (Synergy Hydro, 20 min) *t<sub>R</sub>* =11.32 min (>99%).

**Methyl 14-({[(6E)-14-hydroxy-3-methoxy-17-methyl-4,5-epoxymorphinan-6-ylidene]amino}oxy)-13-oxo-3,6,9-trioxa-12-azatetradecan-1-oate, Oxy-glyoxime-HN-Peg3-O-CH<sub>2</sub>CO<sub>2</sub>Me:** To a clear solution of ({{[(6E)-14-hydroxy-3-methoxy-17-methyl-4,5-epoxymorphinan-6-ylidene]amino}oxy}acetic acid (**Oxy-glyoxime-OH**, 186 mg, 0.48 mmol) in DMF (20 mL) was added pyBOP (328 mg, 0.63 mmol) and methyl {2-[2-(2-aminoethoxy)ethoxy]ethoxy}acetate (**H<sub>2</sub>N-Peg<sub>3</sub>-O-CH<sub>2</sub>CO<sub>2</sub>Me**) (128 mg, 0.58 mmol), then DIEA (418 μL, 2.4 mmol). The reaction mixture was stirred at room temperature for 6 hr under nitrogen atmosphere, then concentrated to dryness *in vacuo*. The residue was purified by column chromatography [20 g SiO<sub>2</sub>, eluent DCM 100% to 50% CMA 80 (Chloroform/MeOH/NH<sub>4</sub>OH 80/19.8/0.2)] to provide methyl 14-({[(6E)-14-hydroxy-3-methoxy-17-methyl-4,5-epoxymorphinan-6-ylidene]amino}oxy)-13-oxo-3,6,9-trioxa-12-azatetradecan-1-oate (**Oxy-glyoxime-HN-Peg<sub>3</sub>-O-Gly-**

**OMe**) as a white powder (94 mg, 32%). ESI MS  $m/z$ : calculated for  $C_{29}H_{41}N_3O_{10}$  591.7, found 592.2 (M+H)<sup>+</sup>; HPLC (Synergy Hydro, 20 min)  $t_R$  =12.37 min (95%).

**Lithium14-(((6E)-14-hydroxy-3-methoxy-17-methyl-4,5-epoxymorphinan-6-ylidene]amino}oxy)-13-oxo-3,6,9-trioxa-12-azatetradecan-1-oate, Oxy-glyoxime-HN-Peg<sub>3</sub>-O-CH<sub>2</sub>CO<sub>2</sub>Li**: To a solution of methyl 14-(((6E)-14-hydroxy-3-methoxy-17-methyl-4,5-epoxymorphinan-6-ylidene]amino}oxy)-13-oxo-3,6,9-trioxa-12-azatetradecan-1-oate (**Oxy-glyoxime-HN-Peg<sub>3</sub>-O-CH<sub>2</sub>CO<sub>2</sub>Me**, 32 mg, 0.054 mmol) in MeOH/THF (1:1, 4 mL) was added H<sub>2</sub>O (0.5 mL), then LiOH (1.3 mg, 0.054 mmol). The reaction mixture was stirred at room temperature for 6 hr and concentrated to dryness *in vacuo*. The residue was re-dissolved in minimal MeOH and precipitated with Et<sub>2</sub>O to provide lithium14-(((6E)-14-hydroxy-3-methoxy-17-methyl-4,5-epoxymorphinan-6-ylidene]amino}oxy)-13-oxo-3,6,9-trioxa-12-azatetradecan-1-oate (**Oxy-glyoxime-HN-Peg<sub>3</sub>-O-CH<sub>2</sub>CO<sub>2</sub>Li**) as a white powder (12 mg, 38%). <sup>1</sup>H NMR (300 MHz, DMSO-*d*<sub>6</sub>)  $\delta$  ppm 1.14 - 1.27 (m, 1 H) 1.29 - 1.59 (m, 3 H) 1.99 - 2.26 (m, 3 H) 2.31 (s, 4 H) 2.34 - 2.47 (m, 2 H) 2.79 (d,  $J$ =6.03 Hz, 1 H) 3.13 (d,  $J$ =18.65 Hz, 1 H) 3.19 - 3.29 (m, 3 H) 3.37 - 3.58 (m, 9 H) 3.69 - 3.80 (m, 4 H) 4.44 (s, 2 H) 4.79 - 4.89 (m, 2 H) 6.60 - 6.70 (m, 1 H) 6.72 - 6.80 (m, 1 H) 7.83 (t,  $J$ =5.56 Hz, 1 H); ESI MS  $m/z$ : calculated for  $C_{28}H_{38}LiN_3O_{10}$  583.6, found 584.9 (M+H)<sup>+</sup>; HPLC (Synergy Hydro, 20 min)  $t_R$  =11.31 min (95%).

# HNMR Spectrum of Oxy-glyoxime-HN-Peg3-O-Gly-OLi

13835-118 recrystallized

|                        |                      |                   |                                                                |                        |                      |
|------------------------|----------------------|-------------------|----------------------------------------------------------------|------------------------|----------------------|
| Acquisition Time (sec) | 5.3084               | Comment           | 13835-118 recrystallized                                       | Date                   | 23 Feb 2016 08:26:24 |
| Date Stamp             | 23 Feb 2016 08:26:24 | File Name         | C:\Users\chasser\Documents\NMR\13835-118 recrystallized\10\fid | Origin                 | spect                |
| Frequency (MHz)        | 300.13               | Nucleus           | <sup>1</sup> H                                                 | Number of Transients   | 128                  |
| Original Points Count  | 32768                | Owner             | nmmuser                                                        | Points Count           | 32768                |
| Receiver Gain          | 812.70               | SW(cyclical) (Hz) | 6172.84                                                        | Solvent                | DMSO-d6              |
| Spectrum Type          | STANDARD             | Sweep Width (Hz)  | 6172.65                                                        | Temperature (degree C) | 27.000               |
|                        |                      |                   |                                                                | Pulse Sequence         | zg30                 |
|                        |                      |                   |                                                                | Spectrum Offset (Hz)   | 1852.0660            |

<sup>1</sup>H NMR (300 MHz, DMSO-d<sub>6</sub>) δ ppm 1.14 - 1.27 (m, 1 H) 1.29 - 1.59 (m, 3 H) 1.99 - 2.26 (m, 3 H) 2.31 (s, 4 H) 2.34 - 2.47 (m, 2 H) 2.79 (d, J=6.03 Hz, 1 H) 3.13 (d, J=18.65 Hz, 1 H) 3.19 - 3.29 (m, 3 H) 3.37 - 3.58 (m, 9 H) 3.69 - 3.80 (m, 4 H) 4.44 (s, 2 H) 4.79 - 4.89 (m, 2 H) 6.60 - 6.70 (m, 1 H) 6.72 - 6.80 (m, 1 H) 7.83 (t, J=5.56 Hz, 1 H)

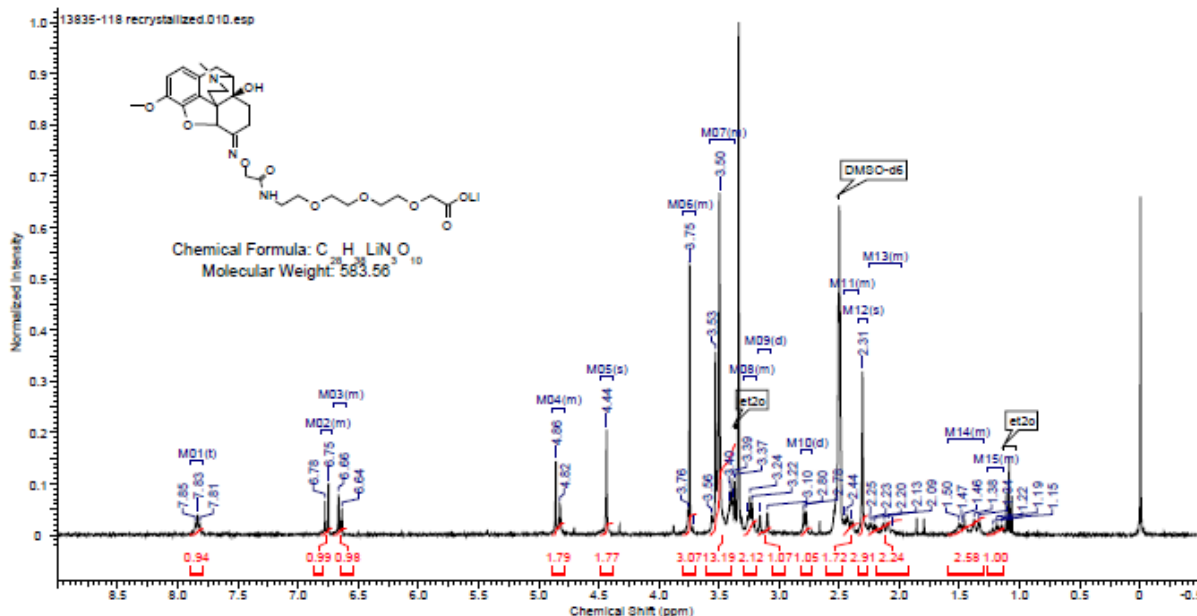

# HPLC Chromatogram of Oxy-glyoxime-HN-Peg3-O-Gly-OLi

Chromatogram : 13835-118 after Et2O recryst 2\_23\_2016 9\_04\_18 AM1\_channel2

System : System\_1  
Method : aut05-95.20min  
synergy hydro analytical

Acquired : 2/23/2016 9:05:26 AM  
Processed : 2/23/2016 9:32:04 AM  
Printed : 9/16/2016 1:03:01 PM

13835-118 after Et2O recryst 2\_23\_2016 9\_04\_18 AM1.DAT - Prostar 335 Absorbance Analog Channel 1 192.168.230.141  
Warning: format Retention times not found. Default format has been applied.

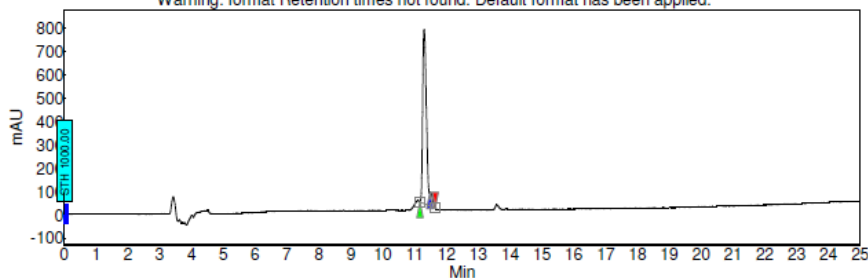

| Index | Name    | Time (Min) | Quantity (% Area) | Height (mAU) | Area (mAU.Min) | Area % (%) |
|-------|---------|------------|-------------------|--------------|----------------|------------|
| 1     | UNKNOWN | 11.31      | 94.51             | 747.3        | 99.9           | 94.507     |
| 2     | UNKNOWN | 11.51      | 5.49              | 59.7         | 5.8            | 5.493      |
| Total |         |            | 100.00            | 807.0        | 105.7          | 100.000    |

## HNMR Spectrum of Oxy-Glyoxime-OH

|                        |                      |                   |                                                         |                        |                      |
|------------------------|----------------------|-------------------|---------------------------------------------------------|------------------------|----------------------|
| Acquisition Time (sec) | 5.3084               | Comment           | 13835-149 crystals                                      | Date                   | 28 Apr 2016 10:58:08 |
| Date Stamp             | 28 Apr 2016 10:58:08 | File Name         | C:\Users\chasser\Documents\NMR\13835-149 crystals\10\fd |                        |                      |
| Frequency (MHz)        | 300.13               | Nucleus           | <sup>1</sup> H                                          | Number of Transients   | 64                   |
| Original Points Count  | 32768                | Owner             | nrmuser                                                 | Points Count           | 32768                |
| Receiver Gain          | 1024.00              | SW(cyclical) (Hz) | 6172.84                                                 | Solvent                | DMSO-d6              |
| Spectrum Type          | STANDARD             | Sweep Width (Hz)  | 6172.55                                                 | Temperature (degree C) | 27.000               |
|                        |                      |                   |                                                         | Pulse Sequence         | zg30                 |
|                        |                      |                   |                                                         | Spectrum Offset (Hz)   | 1852.8137            |

<sup>1</sup>H NMR (300 MHz, DMSO-*d*<sub>6</sub>) δ ppm 1.08 - 1.25 (m, 2 H) 1.35 - 1.62 (m, 3 H) 1.81 (d, *J*=9.23 Hz, 1 H) 2.30 (br. s., 2 H) 2.41 - 2.46 (m, 3 H) 2.63 (br. s., 2 H) 3.05 (br. s., 2 H) 3.14 - 3.23 (m, 1 H) 3.71 - 3.80 (m, 3 H) 4.55 (s, 2 H) 4.94 (br. s., 1 H) 6.69 (d, *J*=7.72 Hz, 1 H) 6.81 (d, *J*=8.10 Hz, 1 H)

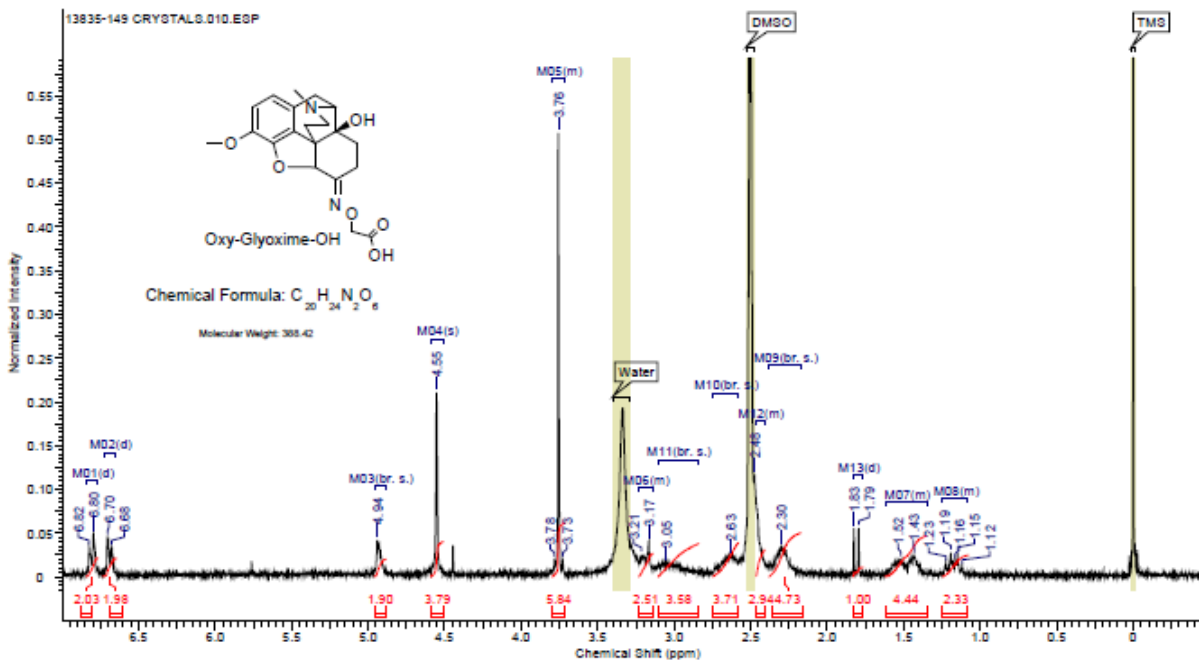

## HPLC Chromatogram of Oxy-GlyoximeOH

Chromatogram : 13835-155 cryst II 5\_10\_2016 10\_43\_38 AM1\_channel2

System : System\_1  
Method : auto5-95.20min  
synergy hydro analytical

Acquired : 5/10/2016 10:44:45 AM  
Processed : 5/10/2016 11:11:23 AM  
Printed : 9/13/2016 2:39:24 PM

13835-155 cryst II 5\_10\_2016 10\_43\_38 AM1.DATA - Prostar 335 Absorbance Analog Channel 1 192.168.230.141  
Warning: format Retention times not found. Default format has been applied.

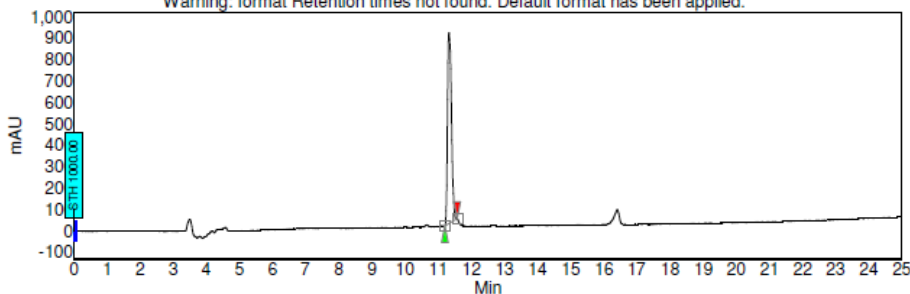

| Index | Name    | Time [Min] | Quantity [% Area] | Height [mAU] | Area [mAU.Min] | Area % [%] |
|-------|---------|------------|-------------------|--------------|----------------|------------|
| 1     | UNKNOWN | 11.32      | 100.00            | 890.6        | 123.7          | 100.000    |
| Total |         |            | 100.00            | 890.6        | 123.7          | 100.000    |

## Peg3-O-Gly-OME

HNMR of Fmoc-HN-



|                        |                      |                   |                                                       |                        |                      |
|------------------------|----------------------|-------------------|-------------------------------------------------------|------------------------|----------------------|
| Acquisition Time (sec) | 5.3084               | Comment           | 13835-110 DMSO                                        | Date                   | 09 Feb 2016 07:13:52 |
| Date Stamp             | 09 Feb 2016 07:13:52 | File Name         | C:\Users\chassler\Documents\NMR\13835-110 DMSO\10.fid |                        |                      |
| Frequency (MHz)        | 300.13               | Nucleus           | 1H                                                    | Number of Transients   | 128                  |
| Original Points Count  | 32768                | Owner             | nmruser                                               | Points Count           | 32768                |
| Receiver Gain          | 912.30               | SW(cyclical) (Hz) | 6172.84                                               | Solvent                | DMSO-d6              |
| Spectrum Type          | STANDARD             | Sweep Width (Hz)  | 6172.65                                               | Temperature (degree C) | 27.000               |
|                        |                      |                   |                                                       | Spectrum Offset (Hz)   | 1852.6998            |

<sup>1</sup>H NMR (300 MHz, DMSO-*d*<sub>6</sub>) δ ppm 3.24 - 3.59 (m, 13 H) 3.41 - 3.41 (m, 1 H) 3.63 (s, 3 H) 4.12 (s, 1 H) 4.18 - 4.24 (m, 1 H) 4.28 (s, 1 H) 4.36 (s, 1 H) 7.25 - 7.46 (m, 5 H) 7.59 (d, *J*=8.29 Hz, 1 H) 7.69 (d, *J*=6.97 Hz, 1 H) 7.82 - 7.93 (m, 2 H)

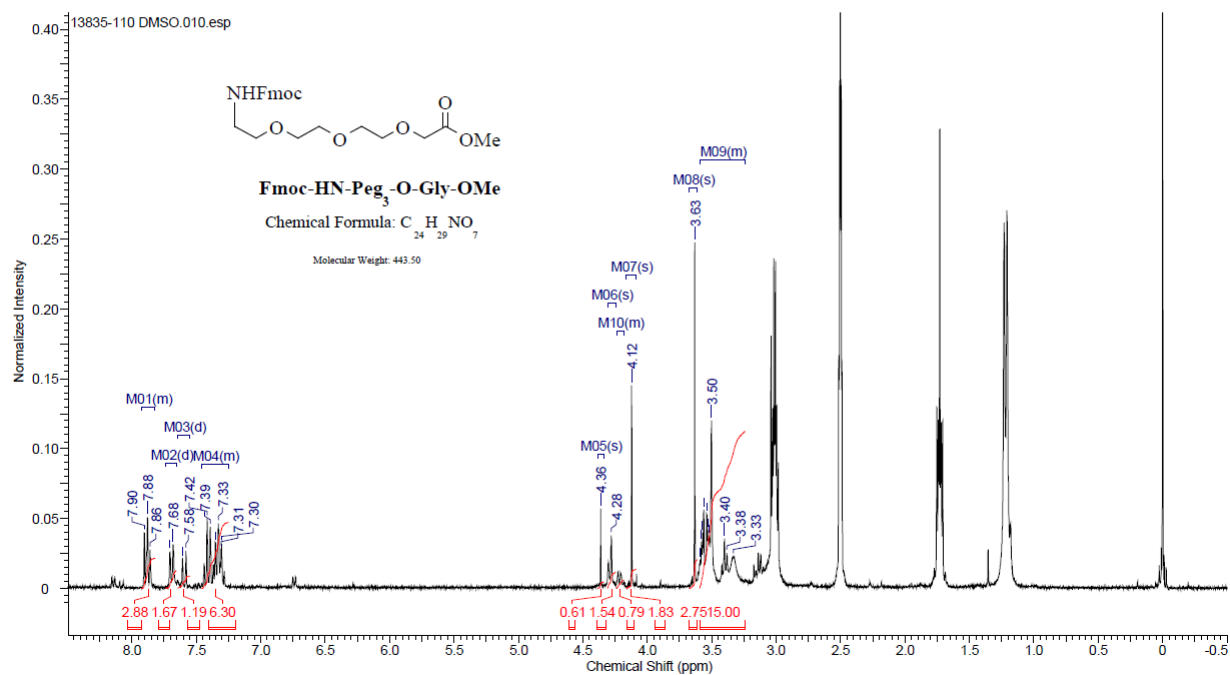

## S2. Synthesis of Oxycodone-based hapten with thiol linker [OXY(Gly)<sub>4</sub>-SH hapten]

Synthesis of Oxy-carboxymethoxyloxime-Gly<sub>4</sub>-NH-cysteaminesulfide dimer (Oxy-Glyoxime-Gly<sub>4</sub>-NH-(CH<sub>2</sub>)<sub>2</sub>-S)<sub>2</sub>)

### Scheme 1: Synthesis of (Oxy-Glyoxime-Gly<sub>4</sub>-NH-(CH<sub>2</sub>)<sub>2</sub>-S)<sub>2</sub>

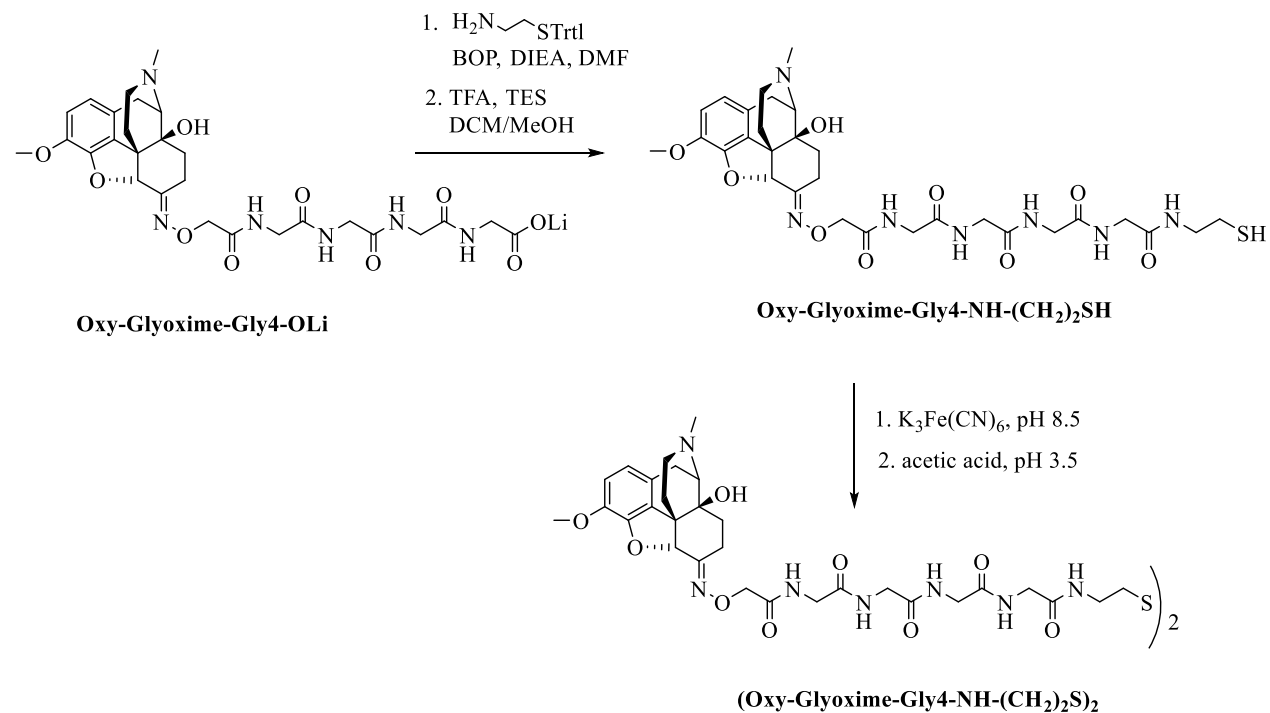

### Experimental details:

**Chemistry General:** All standard reagents were commercially available. Intermediates were purified by column chromatography on a Teledyne ISCO Rf chromatography unit unless otherwise indicated. The purity of intermediates and final compounds was determined using an Agilent-Varian HPLC system equipped with Prostar 210 dual pumps, a Prostar 335 Diode UV detector and a SEDEX75 (SEDERE, Olivet, France) ELSD detector and an analytical Synergy Hydro<sup>®</sup> RP80A C18 (4 μm particle size, 250 x 4.60 mm column; Phenomenex) with a linear gradient of 5%-95% solvent B over 20 min at a flow rate of 1 mL/min. Absorbance was monitored at 220 nm. The HPLC solvent system was binary: water containing

0.1% trifluoroacetic acid (TFA) and solvent B (acetonitrile containing 5% water and 0.1% TFA). The molecular ion of intermediates and final compounds was determined using a PE Sciex API 150 EX LC/MS system from Perkin Elmer (San Jose, California). ESI-HRMS were obtained on a Waters – SYNAPT –G2 mass spectrometer. <sup>1</sup>H NMR spectra were recorded at 300 MHz on a Bruker Avance 300 Spectrospin instrument and at 700 MHz on a Bruker Avance Neo. Chemical shifts are reported as follows: δ in ppm (multiplicity, coupling constant (Hz), and integration. The following abbreviations explain multiplicities: s = singlet, d = doublet, t = triplet, q = quartet, quin = quintet, m = multiplet, br = broad, dd = doublet of doublets.

***N*-[({(5 $\alpha$ ,6*E*)-14-hydroxy-3-methoxy-17-methyl-4,5-epoxymorphinan-6-ylidene]amino}oxy)acetyl]glycylglycylglycyl-*N*-(2-sulfanylethyl)glycinamide (**Oxy-Glyoxime-Gly<sub>4</sub>-NH-(CH<sub>2</sub>)<sub>2</sub>SH**):** To a clear solution of Lithium *N*-[({(6*E*)-14-hydroxy-3-methoxy-17-methyl-4,5-epoxymorphinan-6-ylidene]amino}oxy)acetyl]glycylglycyl-*N*-(carboxylatomethyl)glycinamide (**Oxy-glyoxime-Gly<sub>4</sub>-OLi** 200 mg, 0.32 mmol) in DMF (30 mL) was added BOP (284 mg, 0.643 mmol) and 2-(tritylthio)ethanamine (123 mg, 0.386 mmol), then diisopropylethylamine (280  $\mu$ L, 1.61 mmol). The reaction mixture was stirred at room temperature for 16 hr under nitrogen atmosphere, then concentrated to dryness *in vacuo*. The residue was purified by column chromatography [24 g SiO<sub>2</sub>, eluent 0% to 40% CMA 80 (Chloroform/MeOH/NH<sub>4</sub>OH 80/19.8/0.2) in DCM] to provide *N*-[({(5 $\alpha$ ,6*E*)-14-hydroxy-3-methoxy-17-methyl-4,5-epoxymorphinan-6-ylidene]amino}oxy)acetyl]glycylglycylglycyl-*N*-[2-(tritylsulfanyl)ethyl]glycinamide (**Oxy-Glyoxime-Gly<sub>4</sub>-NH-(CH<sub>2</sub>)<sub>2</sub>STrtl**) as a yellow powder (192 mg, 65%). To a solution of this material in DCM/MeOH (10 mL/4 mL) was added TFA (6 mL) and triethylsilane (0.3 mL), and the solution stirred at room temperature for 1 hr. The mixture was concentrated to dryness and purified by column chromatography [12 g SiO<sub>2</sub>, eluent 0% to 40% CMA 80 (Chloroform/MeOH/NH<sub>4</sub>OH 80/19.8/0.2) in DCM] to provide **Oxy-Glyoxime-Gly<sub>4</sub>-NH-(CH<sub>2</sub>)<sub>2</sub>SH** (91 mg, 64%) as a white powder. <sup>1</sup>H NMR (300 MHz, DMSO-*d*<sub>6</sub>) δ ppm 1.12 - 1.31 (m, 1 H) 1.39 - 1.69 (m, 2 H) 2.25 - 2.43 (m, 2 H) 2.55 - 3.03 (m, 10 H) 3.09 - 3.27 (m, 4 H) 3.56 - 4.03 (m, 12 H) 4.45 - 4.63 (m,

2 H) 5.01 (br. s., 1 H) 6.62 - 6.87 (m, 2 H) 7.79 - 7.97 (m, 2 H) 8.06 - 8.28 (m, 3 H); ESI MS  $m/z$ : calculated for  $C_{30}H_{41}N_7O_9S$  675.76, found 676.6 (M+H)<sup>+</sup>; HPLC (Synergy Hydro, 20 min)  $t_R$  =10.96 min (>95%).

**(Oxy-Glyoxime-Gly<sub>4</sub>-NH-(CH<sub>2</sub>)<sub>2</sub>S)<sub>2</sub>**: To a solution of **Oxy-Glyoxime-Gly<sub>4</sub>-NH-(CH<sub>2</sub>)<sub>2</sub>SH** (87 mg, 0.129 mmol) in water/acetonitrile/methanol (40 mL, ratio 2/1/1) was added pH 8.5 NH<sub>4</sub>OAc buffer solution (2.5 mL) and the reaction mixture saturated with nitrogen. Potassium ferricyanide (125 mg, 0.380 mmol) was added and the reaction mixture stirred at room temperature for 16 hr. The solution was acidified to pH 3.5 with glacial acetic acid, then stirred over Amberlite IRA-68 resin for 20 min and filtered. The filtrate was concentrated to dryness and purified by column chromatography [130 g C18, eluent 0% to 100% MeOH in water] to provide **Oxy-Glyoxime-Gly<sub>4</sub>-NH-(CH<sub>2</sub>)<sub>2</sub>S)<sub>2</sub>** (79mg, 91%) as a white solid. <sup>1</sup>H NMR (700 MHz, DMSO-*d*<sub>6</sub>)  $\delta$  ppm 1.47 (d,  $J$ =5.72 Hz, 6 H) 2.33 - 2.44 (m, 3 H) 2.57 - 2.86 (m, 14 H) 3.29 - 3.46 (m, 11 H) 3.61 - 3.82 (m, 26 H) 4.52 (br. s., 4 H) 5.11 (br. s., 2 H) 6.68 - 6.78 (m, 1 H) 6.83 - 6.90 (m, 1 H) 7.09 - 7.15 (m, 1 H) 7.19 - 7.38 (m, 4 H) 7.65 - 7.77 (m, 1 H) 7.89 - 7.97 (m, 1 H) 8.01 - 8.09 (m, 1 H) 8.15 (br. s., 4 H); ESI HRMS  $m/z$ : calculated for  $C_{60}H_{80}N_{14}O_{18}S$  1349.50, found 1349.53 (M)<sup>+</sup>, 675.27 (M)<sup>2+</sup>. HPLC (Synergy Hydro, 20 min)  $t_R$  =11.59 min (>95%).

## HNMR Spectrum of (Oxy-Glyoxime-Gly<sub>4</sub>-NH-(CH<sub>2</sub>)<sub>2</sub>S)<sub>2</sub>

|                        |                                                                |                        |                      |                      |                      |
|------------------------|----------------------------------------------------------------|------------------------|----------------------|----------------------|----------------------|
| Acquisition Time (sec) | 2.3593                                                         | Date                   | 06 Feb 2018 19:29:04 | Date Stamp           | 06 Feb 2018 19:29:04 |
| File Name              | C:\Users\schassler\Documents\NMR\14130-37 700 MHz\10\data\111r |                        |                      | Frequency (MHz)      | 700.20               |
| Nucleus                | 1H                                                             | Number of Transients   | 256                  | Origin               | spect                |
| Owner                  | nmrstu                                                         | Points Count           | 65536                | Pulse Sequence       | zg30                 |
| SW(cyclical) (Hz)      | 13888.89                                                       | Solvent                | DMSO-d6              | Spectrum Offset (Hz) | 4322.6074            |
| Sweep Width (Hz)       | 13888.68                                                       | Temperature (degree C) | 25.000               | Receiver Gain        | 32.00                |
|                        |                                                                |                        |                      | Spectrum Type        | STANDARD             |

<sup>1</sup>H NMR (700 MHz, DMSO-*d*<sub>6</sub>) δ ppm 1.47 (d, *J*=5.72 Hz, 6 H) 2.33 - 2.44 (m, 3 H) 2.57 - 2.86 (m, 14 H) 3.29 - 3.46 (m, 11 H) 3.61 - 3.82 (m, 26 H) 4.52 (br. s., 4 H) 5.11 (br. s., 2 H) 6.68 - 6.78 (m, 1 H) 6.83 - 6.90 (m, 1 H) 7.09 - 7.15 (m, 1 H) 7.19 - 7.38 (m, 4 H) 7.65 - 7.77 (m, 1 H) 7.89 - 7.97 (m, 1 H) 8.01 - 8.09 (m, 1 H) 8.15 (br. s., 4 H)

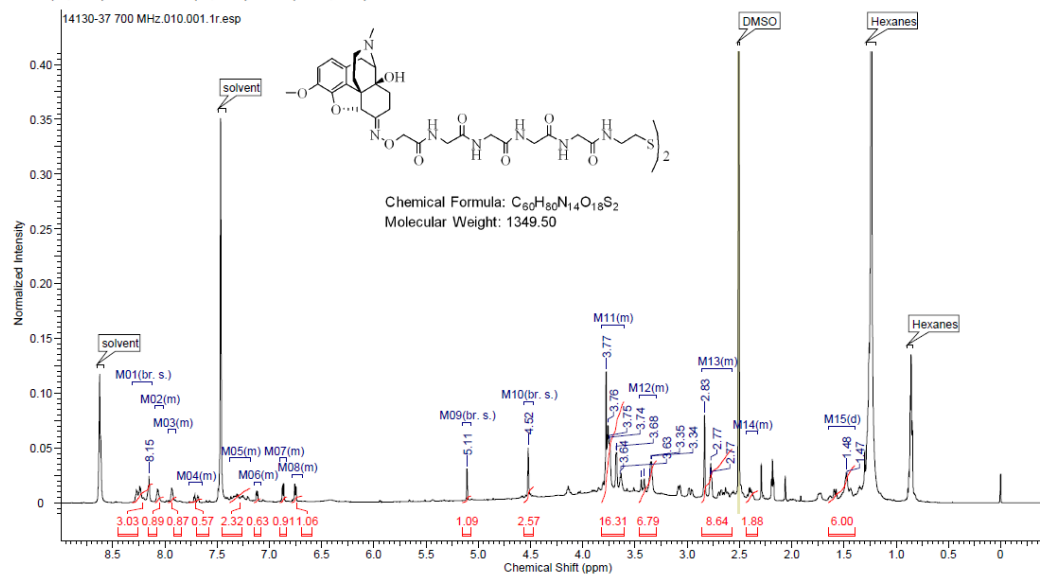

## HPLC Chromatogram of (Oxy-Glyoxime-Gly<sub>4</sub>-NH-(CH<sub>2</sub>)<sub>2</sub>S)<sub>2</sub>

### Chromatogram : 14130-27-1 fr15-23 5\_25\_2017 2\_07\_31 PM1\_channel2

System : System\_1  
Method : auto5-95.20min  
synergy hydro analytical

Acquired : 5/25/2017 2:08:39 PM  
Processed : 5/25/2017 2:40:31 PM  
Printed : 2/5/2018 5:24:45 PM

14130-27-1 fr15-23 5\_25\_2017 2\_07\_31 PM1.DATA - Prostar 335 Absorbance Analog Channel 1 192.168.230.141  
Warning: format Retention times not found. Default format has been applied.

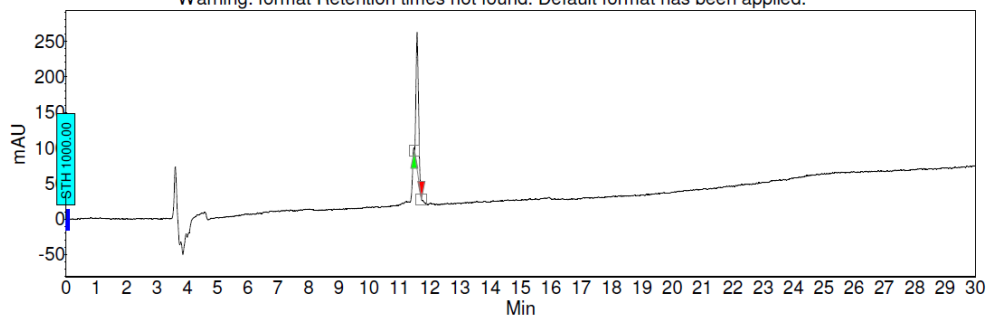

| Index | Name    | Time [Min] | Quantity [% Area] | Height [mAU] | Area [mAU.Min] | Area % [%] |
|-------|---------|------------|-------------------|--------------|----------------|------------|
| 1     | UNKNOWN | 11.59      | 100.00            | 192.5        | 19.3           | 100.000    |
| Total |         |            | 100.00            | 192.5        | 19.3           | 100.000    |

## HRMS of (Oxy-Glyoxime-Gly<sub>4</sub>-NH-(CH<sub>2</sub>)<sub>2</sub>S)<sub>2</sub>

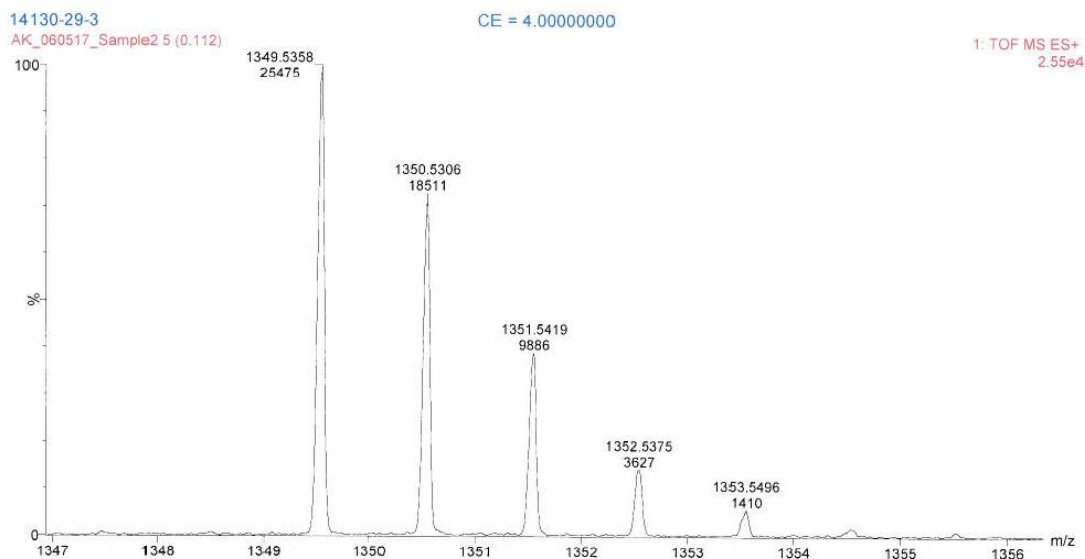

## HNMR Spectrum of Oxy-Glyoxime-Gly<sub>4</sub>-NH-(CH<sub>2</sub>)<sub>2</sub>SH

|                        |                      |                   |                                                   |                        |                      |
|------------------------|----------------------|-------------------|---------------------------------------------------|------------------------|----------------------|
| Acquisition Time (sec) | 5.3084               | Comment           | 14130-36-2                                        | Date                   | 19 Jun 2017 11:49:20 |
| Date Stamp             | 19 Jun 2017 11:49:20 | File Name         | C:\Users\schasser\Documents\NMR\14130-36-2\10\fid |                        |                      |
| Frequency (MHz)        | 300.13               | Nucleus           | <sup>1</sup> H                                    | Number of Transients   | 256                  |
| Original Points Count  | 32768                | Owner             | rimuser                                           | Points Count           | 32768                |
| Receiver Gain          | 1024.00              | SW(cyclical) (Hz) | 6172.84                                           | Solvent                | DMSO-d6              |
| Spectrum Type          | STANDARD             | Sweep Width (Hz)  | 6172.65                                           | Temperature (degree C) | 27.000               |
|                        |                      |                   |                                                   | Pulse Sequence         | zg30                 |
|                        |                      |                   |                                                   | Spectrum Offset (Hz)   | 1852.9191            |

<sup>1</sup>H NMR (300 MHz, DMSO-*d*<sub>6</sub>) δ ppm 1.12 - 1.31 (m, 1 H) 1.39 - 1.69 (m, 2 H) 2.25 - 2.43 (m, 2 H) 2.55 - 3.03 (m, 10 H) 3.09 - 3.27 (m, 4 H) 3.56 - 4.03 (m, 12 H) 4.45 - 4.63 (m, 2 H) 5.01 (br. s., 1 H) 6.62 - 6.87 (m, 2 H) 7.79 - 7.97 (m, 2 H) 8.06 - 8.28 (m, 3 H)

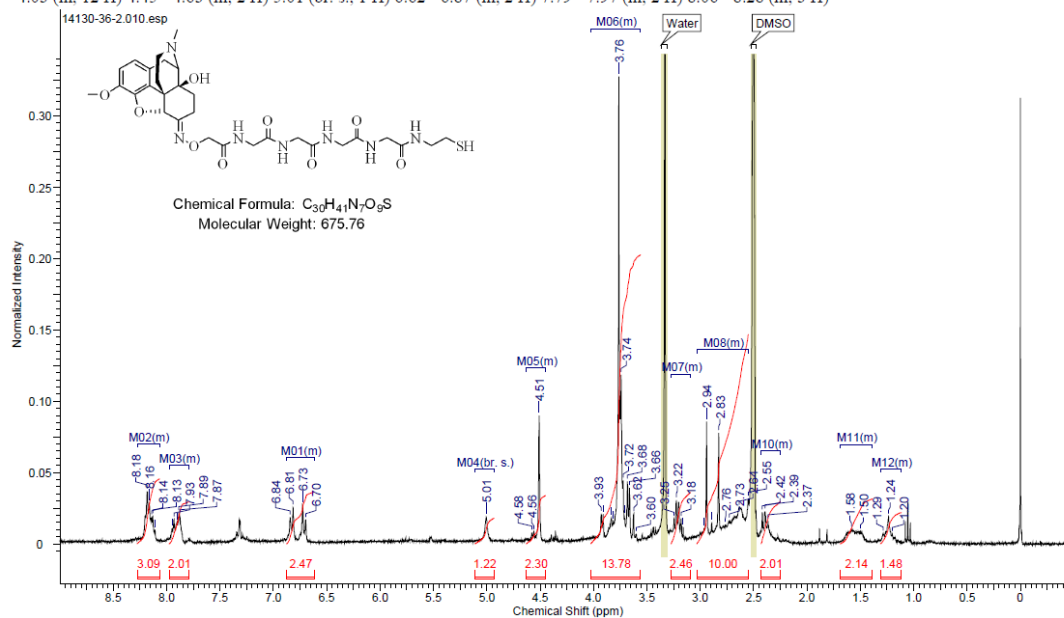

# HPLC Chromatogram of Oxy-Glyoxime-Gly<sub>4</sub>-NH-(CH<sub>2</sub>)<sub>2</sub>SH

Chromatogram : 14130-22 fr 35-45 4\_28\_2017 3\_36\_03 PM1\_channel1

System : System\_2  
Method : 5to95%B20 min  
synergy hydro analytical

Acquired : 4/28/2017 3:37:00 PM  
Processed : 4/28/2017 4:03:35 PM  
Printed : 2/5/2018 5:22:37 PM

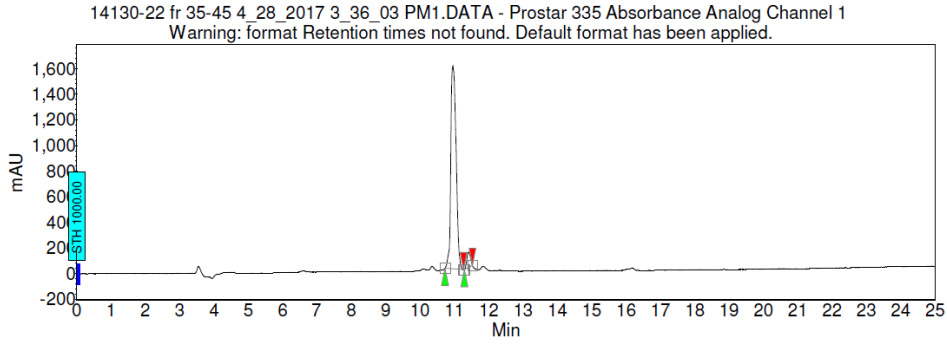

| Index | Name    | Time [Min] | Quantity [% Area] | Height [mAU] | Area [mAU.Min] | Area % [%] |
|-------|---------|------------|-------------------|--------------|----------------|------------|
| 1     | UNKNOWN | 10.96      | 95.23             | 1585.5       | 283.1          | 95.228     |
| 2     | UNKNOWN | 11.41      | 4.77              | 120.6        | 14.2           | 4.772      |
| Total |         |            | 100.00            | 1706.1       | 297.3          | 100.000    |

**S3. Expansion of the early hapten-specific B cell population in mice immunized with oxycodone conjugate vaccines containing different carrier proteins.**

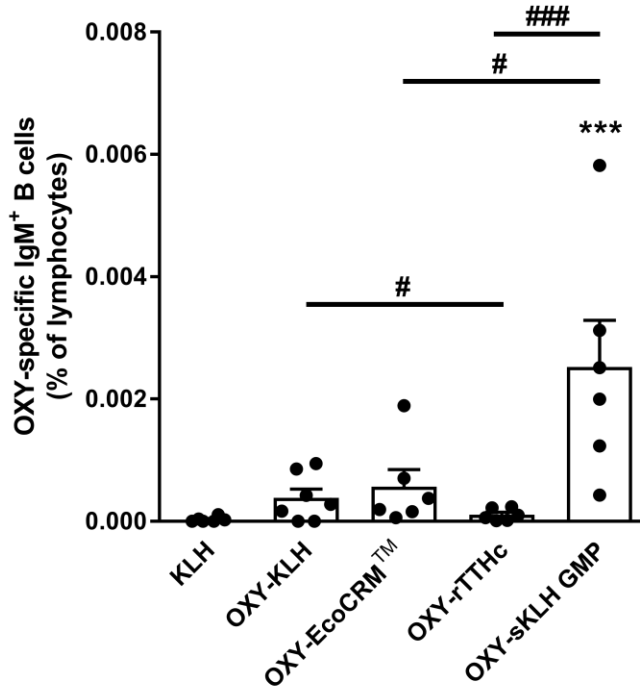

BALB/c mice ( $n \geq 4$ /group) were immunized IM with 100  $\mu$ g unconjugated KLH, OXY-KLH, OXY-EcoCRM<sup>™</sup>, OXY-rTTHc, or OXY-sKLH, formulated with 70  $\mu$ g of alum. At 7 days post-immunization, hapten-specific B cell populations from spleen and lymph nodes were analyzed by antigen-based magnetic enrichment paired with flow cytometry. OXY-specific IgM<sup>+</sup> B cells are expressed as percentage (%) of the total lymphocyte population after magnetic enrichment. P value symbols: asterisk (\*) represents experimental groups compared to KLH, pound (#) represents inter-experimental group comparisons. #,  $p \leq 0.05$ , \*\*\*,  $p \leq 0.001$ , ###,  $p \leq 0.001$  (by one-way ANOVA followed by Tukey's multiple comparison post hoc test). Line and error bar represent mean  $\pm$  SEM.



**S4. Efficacy of OXY-rTTHc in attenuating oxycodone-induced respiratory depression and bradycardia in mice.**

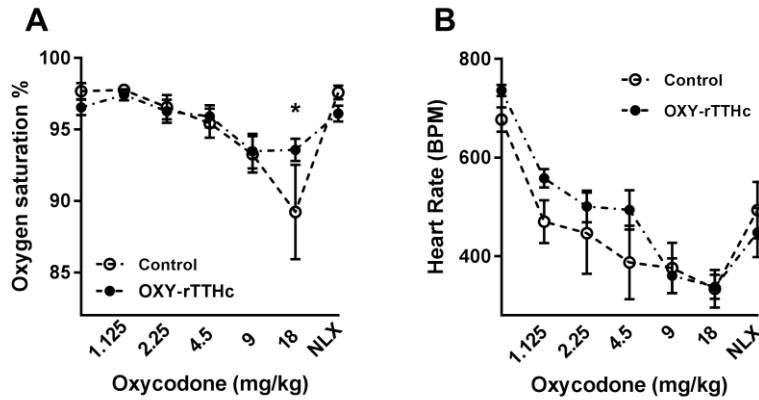

Oxycodone-induced respiratory depression and bradycardia were tested by oximetry one week after the last immunization as previously described<sup>1,2</sup>. A mouseOx (STARR life sciences corp., Oakmont, PA) was placed via neck collar to measure oxygen saturation and heart rate. After baseline recording, mice were challenged every 15 min with increasing oxycodone sc doses of 1.125, 2.25, 4.5, 9.0 mg/kg for a cumulative dose of 18 mg/kg, followed by administration of 0.1 mg/kg naloxone to reverse the effects of oxycodone. Respiratory activity and heart rate were measured 15 min after each oxycodone dose. In both panels, the X-axis shows the oxycodone cumulative dose administered over time. **A**) Percentage (%) oxygen saturation, and **B**) heart rate expressed in beat per minute (BPM). Statistical significance was assessed by two-way ANOVA followed by Tukey post hoc test. \*  $p \leq 0.05$ . There were no differences between the two groups following naloxone treatment. Data are expressed as mean  $\pm$  SEM, control (n = 4), and OXY-rTTHc (n=5).

### Supplemental Material References:

1. Raleigh, M. D.; Laudenbach, M.; Baruffaldi, F.; Peterson, S. J.; Roslawski, M. J.; Birnbaum, A. K.; Carroll, F. I.; Runyon, S. P.; Winston, S.; Pentel, P. R.; Pravetoni, M. Opioid dose- and route-dependent efficacy of oxycodone and heroin vaccines in rats. *Journal of Pharmacology and Experimental Therapeutics* **2018**.
2. Laudenbach, M.; Baruffaldi, F.; Robinson, C.; Carter, P.; Seelig, D.; Baehr, C.; Pravetoni, M. Blocking interleukin-4 enhances efficacy of vaccines for treatment of opioid abuse and prevention of opioid overdose. *Scientific Reports* **2018**, *8*, (1), 5508.
